# Supplementary material for: Short-Term Impacts of Meteorology, Air Pollution, and Internet Search Data on Viral Diarrhea Infection among Children in Jilin Province, China
Source: MDPI journal article supplement (doi:10.3390/ijerph182111615), 2021-11-04

## Supporting Information

**Table S1: The selected 20 keywords about viral diarrhea for Baidu search data acquisition**

| Title (Chinese) | Interpretation in English | Title (Chinese) | Interpretation in English |
|-----------------|---------------------------|-----------------|---------------------------|
| 84 消毒液          | 84 Disinfectant           | 急性胃肠炎           | Acute Gastroenteritis     |
| 口服补液盐           | Salesre Hydration Soralis | 益生菌             | Probiotics                |
| 合生元             | Synbiotics                | 腺病毒             | Adenovirus                |
| 妈咪爱             | Medilac-Vita              | 蒙脱石散            | Montmorillonite Powder    |
| 尿不湿             | Diapers                   | 诺如病毒            | Norovirus                 |
| 消毒液             | Disinfectant              | 轮状病毒            | Rotavirus                 |
| 湿巾              | Wet Wipes                 | 腹泻              | Diarrhea                  |
| 滴露              | Dettol                    | 腹痛              | Stomachache               |
| 生蚝              | Oyster                    | 呕吐              | Vomiting                  |
| 牡蛎              | Oyster                    | 发热              | Fever                     |

**Figure S1: Effect of 4 Major Factors on Virus Diarrhea, Male**

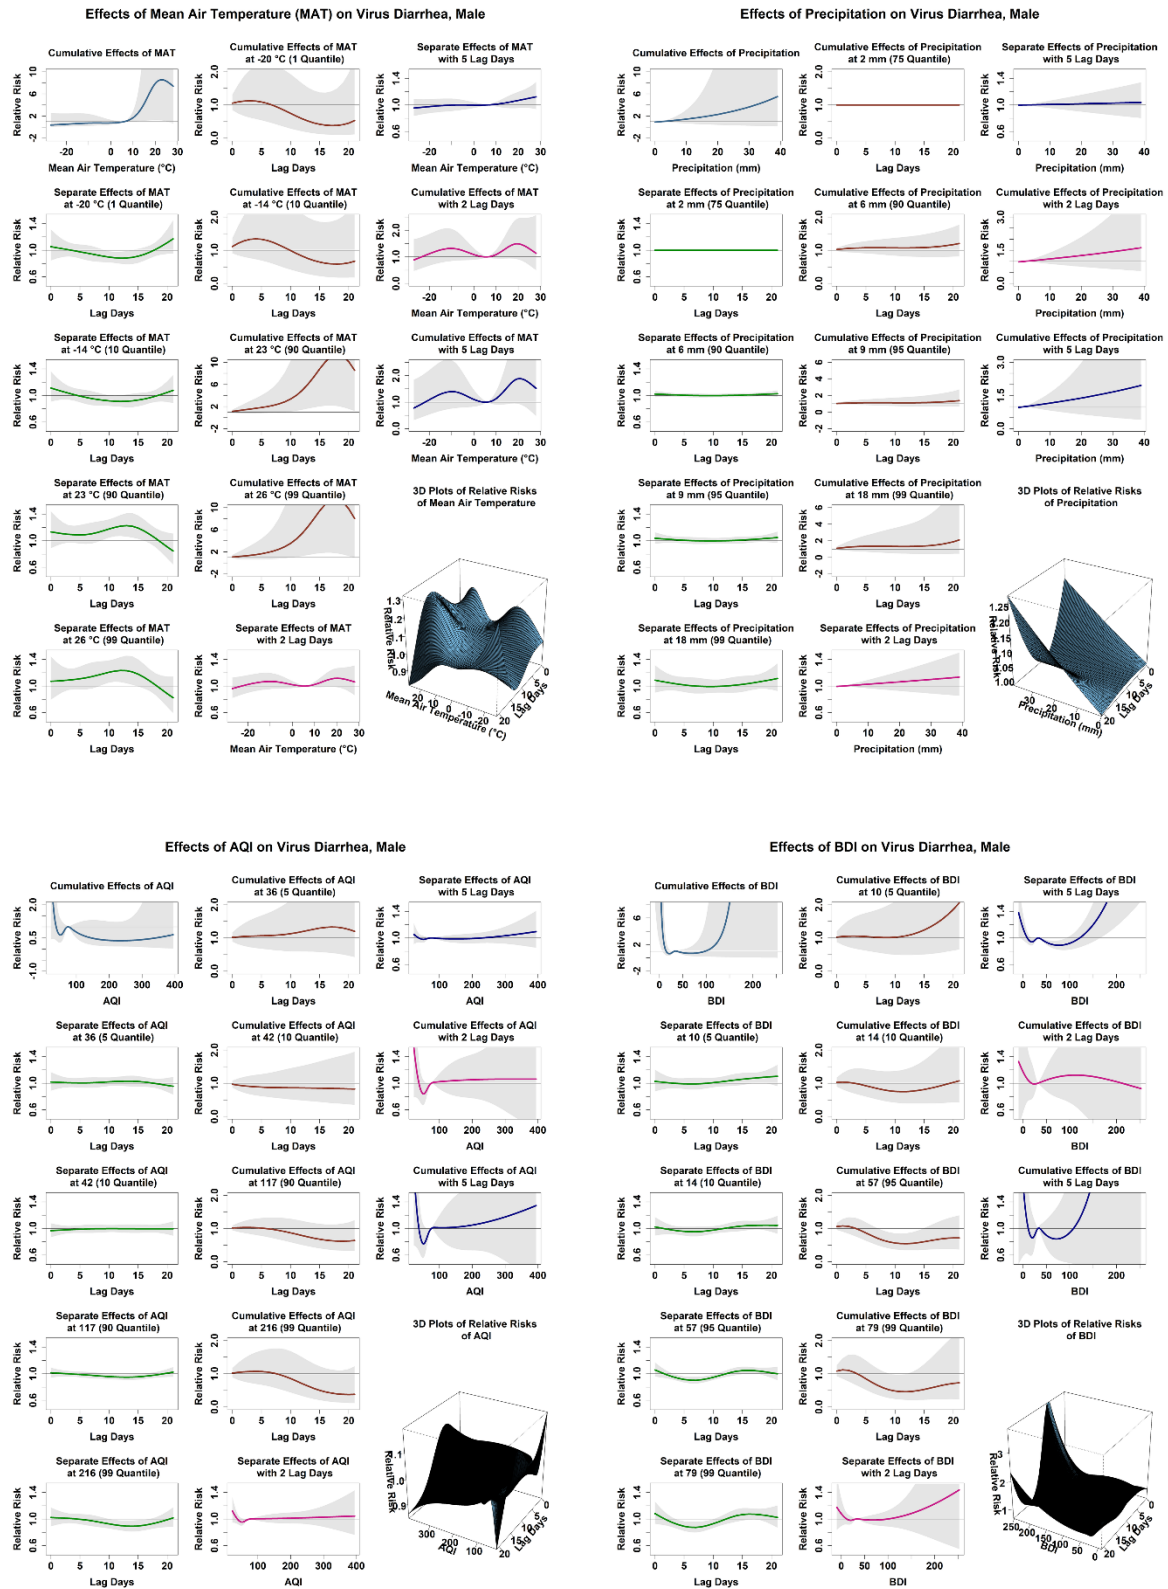

**Figure S2: Effect of 4 Major Factors on Virus Diarrhea, Female**

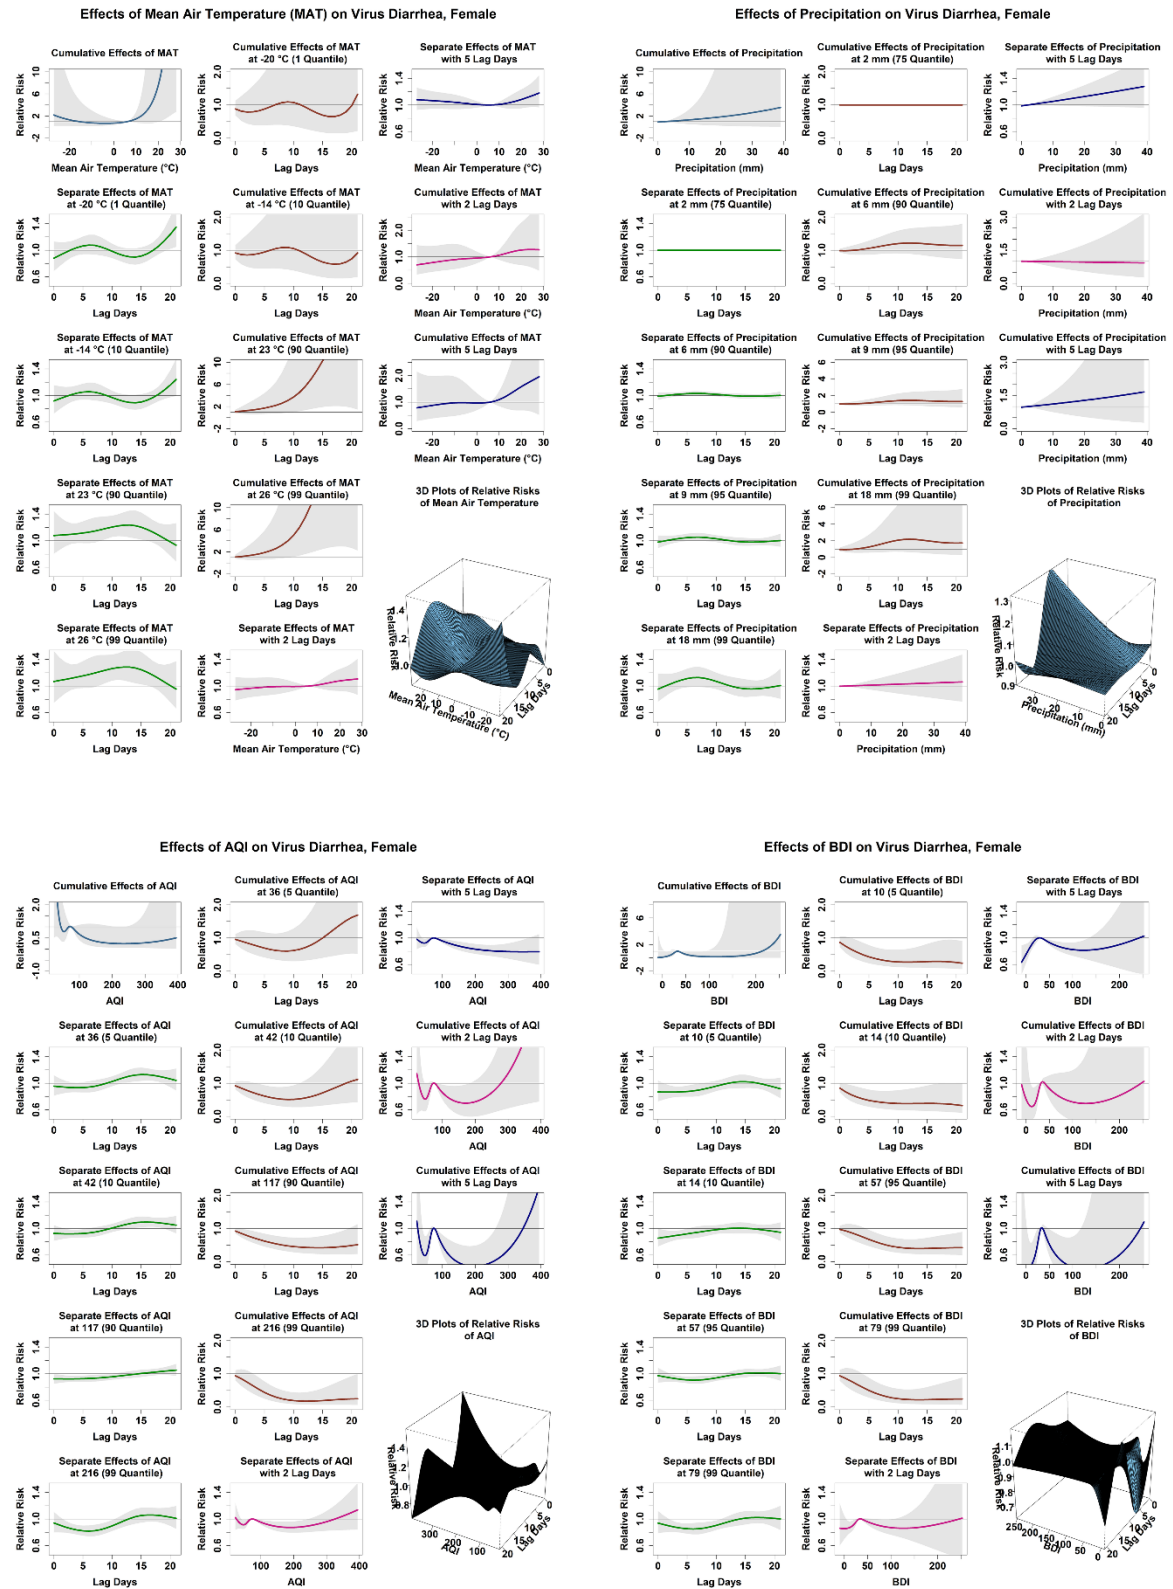

**Figure S3: Effect of 4 Major Factors on Virus Diarrhea, 0-1 Years Old**

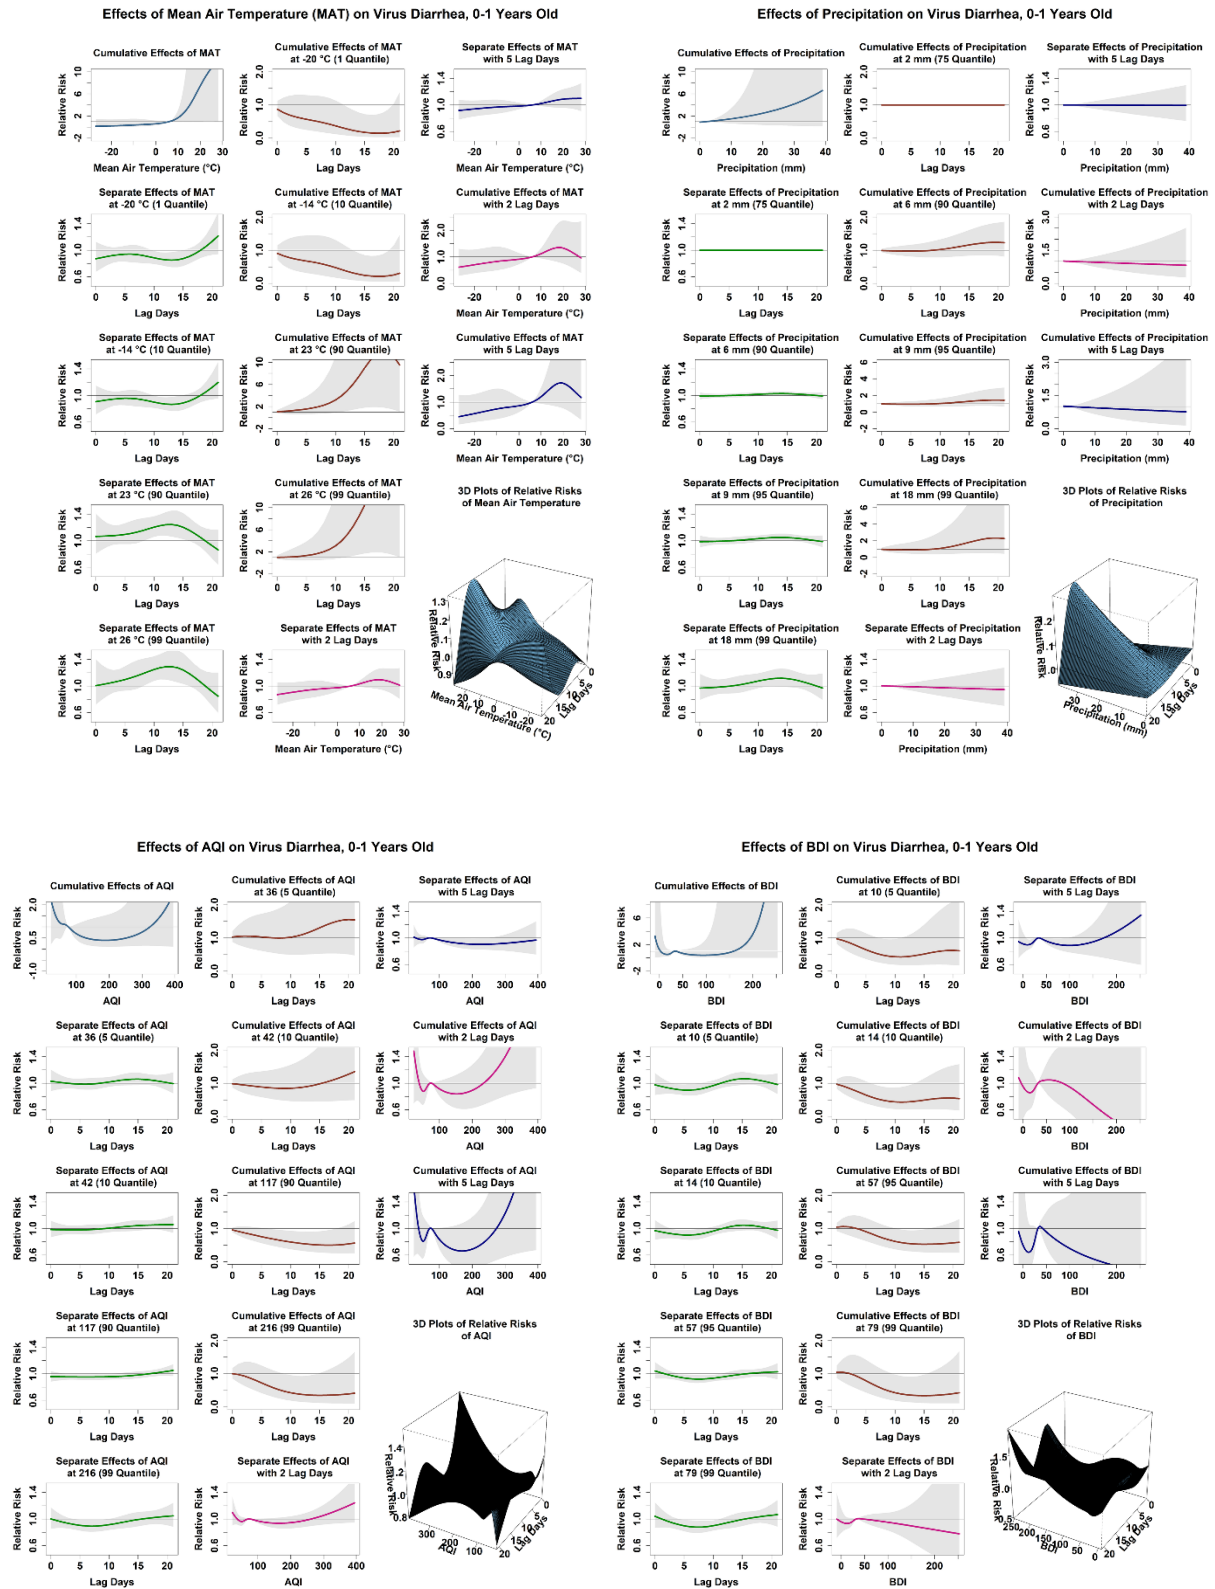

**Figure S4: Effect of 4 Major Factors on Virus Diarrhea, 1-2 Years Old**

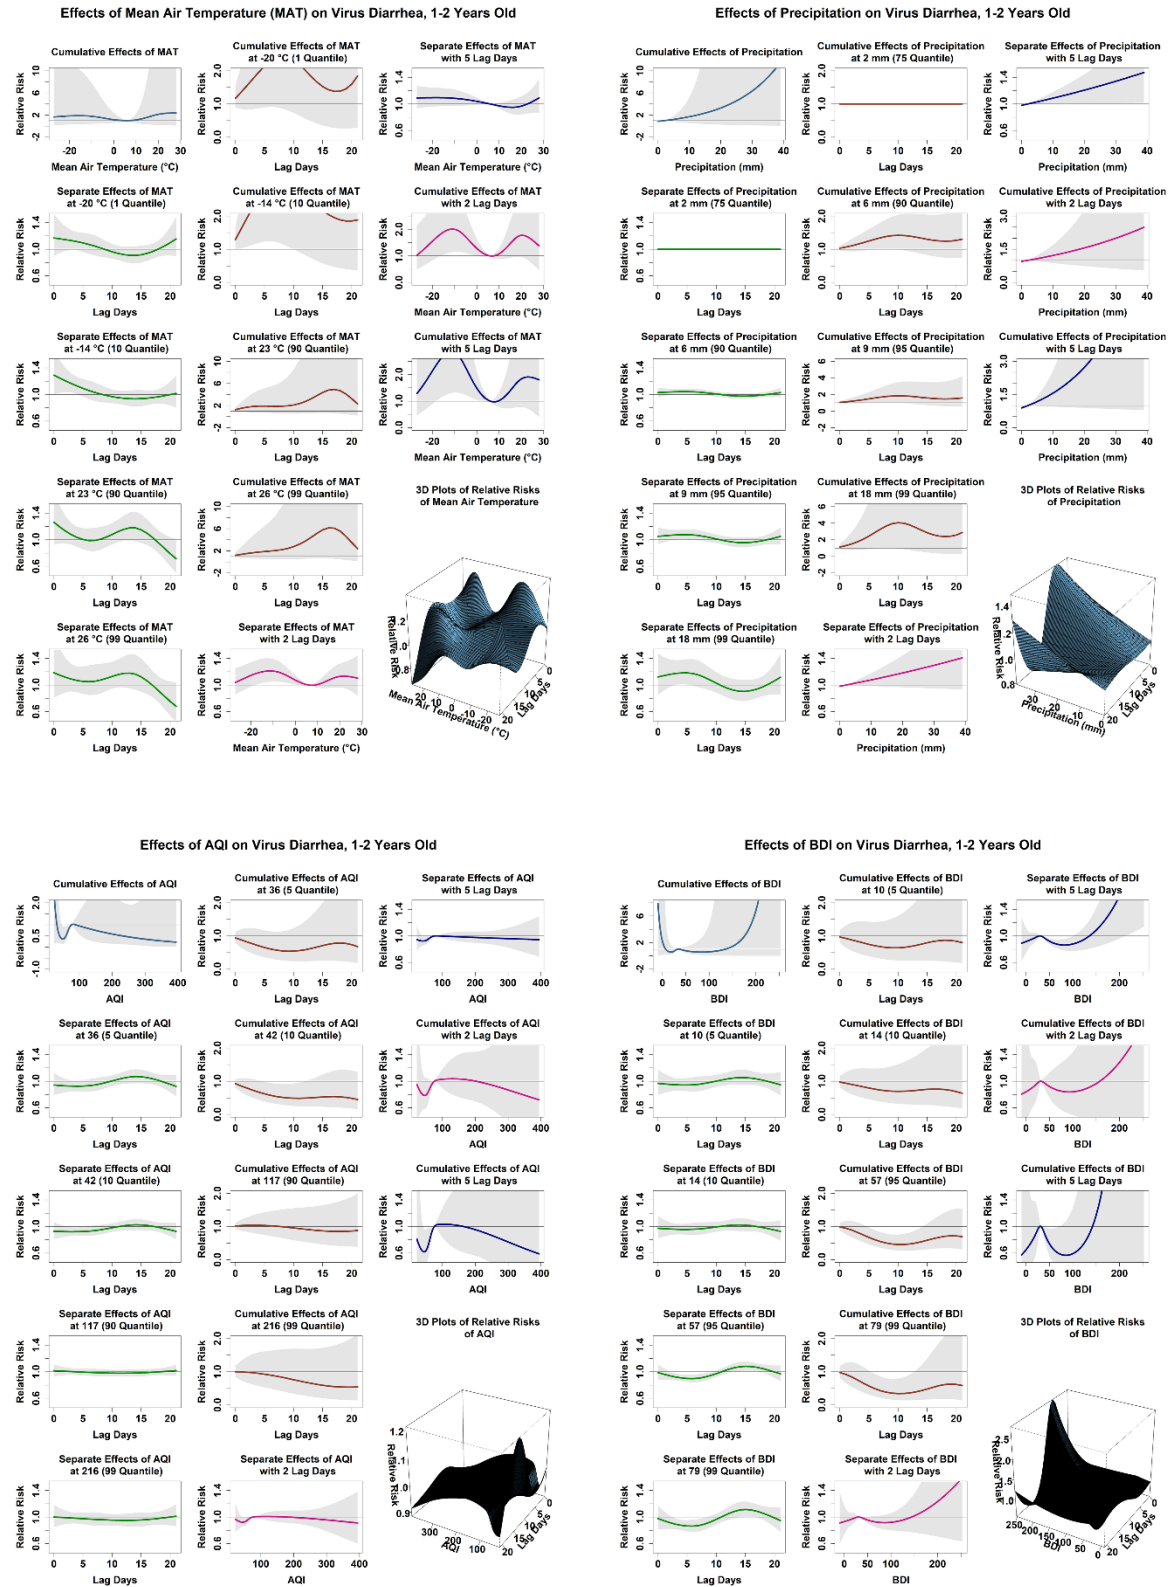



**Figure S5: Effect of 4 Major Factors on Virus Diarrhea, 2-5 Years Old**

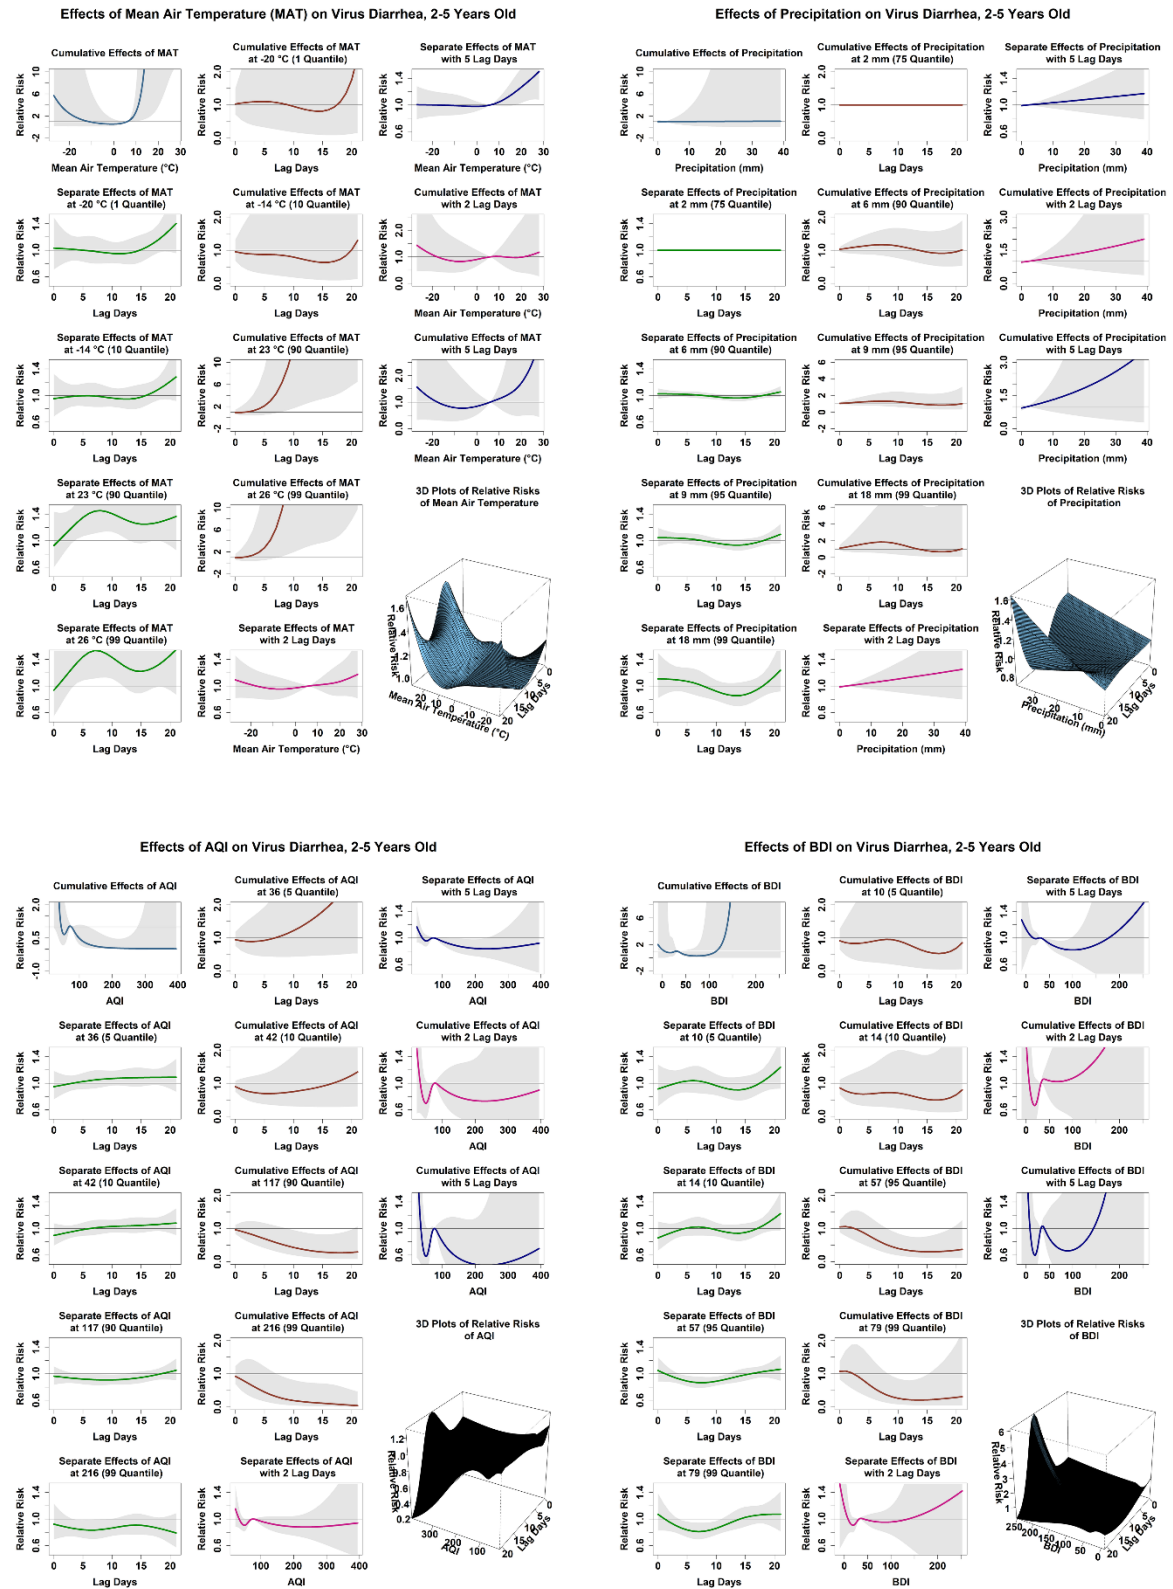

Supplement: s1 [file s1]
